# Supplementary material for: Stress-Inducible Caspase Substrate TRB3 Promotes Nuclear Translocation of Procaspase-3
Source: PubMed Central journal article supplement (PMC3415431; doi:10.1371/journal.pone.0042721), 2012-08-09
Supplement: pone.0042721.s001.pdf [file pone.0042721.s001.pdf]

# Figure S1

Cleavage site of human TRB3 (Asp338)

| Organism               |     | Consensus                                         | Identity |
|------------------------|-----|---------------------------------------------------|----------|
|                        |     | S H L W E A D Q V V P D - G P G L E E A E         |          |
| Homo sapiens           | 327 | S H L W E A A Q V V P D - G L G L D E A R ... 358 | 100%     |
| Pongo abelii           | 327 | S H L W E A D Q E V P D - G P G L D E A R ... 358 | 95.8%    |
| Macaca mulatta         | 354 | S H L W E A D Q V V P D - G P G P D E A R ... 385 | 93.9%    |
| Callithrix jacchus     | 354 | S H L W E A D Q V V P D - G P R L D E A K ... 385 | 91.3%    |
| Canis lupus familiaris | 327 | S H L W E A D Q V V P E - G P G L E E A E ... 358 | 83.7%    |
| Ailuropoda melanoleuca | 325 | S R L W E A D Q V V P E - G L G L E E A E ... 356 | 83.4%    |
| Bos taurus             | 327 | S R H C E A D Q V V P E - G P G L E E A E ... 357 | 83.1%    |
| Oryctolagus cuniculus  | 325 | P H L W E A D Q V V P D - G P G L E E A E ... 356 | 79.5%    |
| Mus musculus           | 327 | S D R R E M D Q V V P D - G P Q L E E A E ... 354 | 74.0%    |
| Rattus norvegicus      | 322 | S D R R E M D Q V V P D - G P Q L E E A E ... 349 | 73.5%    |
| Danio rerio            | 327 | S S R H S T D Q V V P D F Q P S Q T E D C ... 348 | 52.9%    |
