# Supplementary material for: Stress-Inducible Caspase Substrate TRB3 Promotes Nuclear Translocation of Procaspase-3
Source: PubMed Central journal article supplement (PMC3415431; doi:10.1371/journal.pone.0042721), 2012-08-09

# Figure S9

A

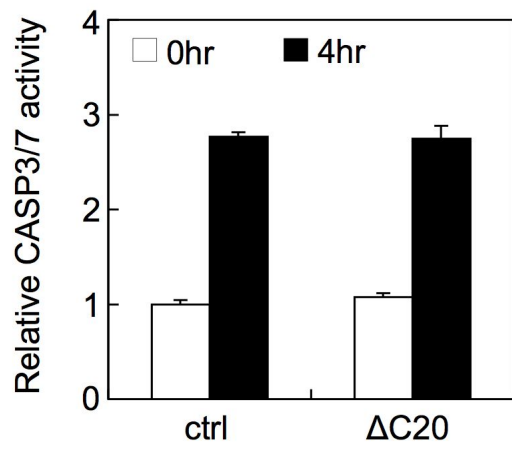

B

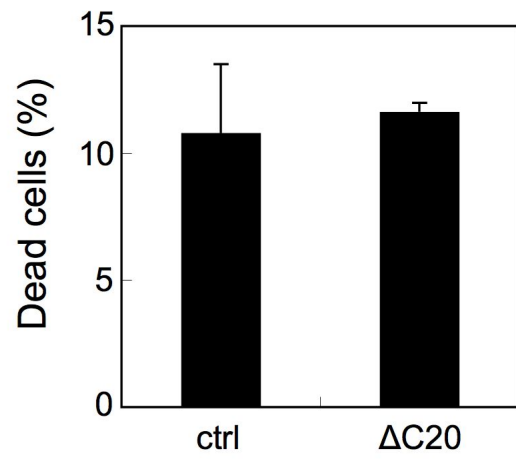

Supplement: pone.0042721.s009.pdf [file pone.0042721.s009.pdf]
